# Supplementary material for: Plant-Rich Field Margins Influence Natural Predators of Aphids More Than Intercropping in Common Bean
Source: MDPI journal article supplement (doi:10.3390/insects13070569), 2022-06-23
Supplement: s1 [file s1]

## Supplementary Tables

**Table S1.** Mean  $\pm$  (SEM) numbers of natural enemies in fields collected by sticky traps.

| Diversity | Mean Number of Natural Enemies ( $\pm$ SEM) |                  |                  |                  |                  |                  |                         |                  |
|-----------|---------------------------------------------|------------------|------------------|------------------|------------------|------------------|-------------------------|------------------|
|           | Lady Beetle                                 | Syrphid Fly      | Lacewing         | Parasitic Wasp   | Predatory Fly    | Parasitic Fly    | Other Predatory Beetles | Predatory bug    |
| High      | 1.67 $\pm$ 0.21a                            | 1.61 $\pm$ 0.17a | 1.36 $\pm$ 0.17a | 1.30 $\pm$ 0.14a | 1.39 $\pm$ 0.17a | 1.42 $\pm$ 0.15a | 0.73 $\pm$ 0.09a        | 1.50 $\pm$ 0.15a |
| Low       | 0.73 $\pm$ 0.96b                            | 0.67 $\pm$ 0.09b | 0.84 $\pm$ 0.12b | 1.14 $\pm$ 0.14a | 0.51 $\pm$ 0.09b | 0.44 $\pm$ 0.08b | 0.33 $\pm$ 0.07b        | 0.73 $\pm$ 0.12b |

Values followed by the same letters (a and b) within the column are not significantly different ( $p < 0.05$ ).

**Table S2.** Mean  $\pm$  (SEM) numbers of natural enemies in fields collected by sweep nets.

| Diversity | Mean Number of Natural Enemies ( $\pm$ SEM) |                  |                  |                  |                  |                  |                         |                  |
|-----------|---------------------------------------------|------------------|------------------|------------------|------------------|------------------|-------------------------|------------------|
|           | Lady Beetle                                 | Syrphid Fly      | Lacewing         | Parasitic Wasp   | Predatory Fly    | Parasitic Fly    | Other Predatory Beetles | Predatory bug    |
| High      | 0.90 $\pm$ 0.06a                            | 0.89 $\pm$ 0.06a | 0.90 $\pm$ 0.06a | 1.08 $\pm$ 0.06a | 1.16 $\pm$ 0.17a | 1.01 $\pm$ 0.06a | 0.80 $\pm$ 0.05a        | 0.78 $\pm$ 0.05a |
| Low       | 0.80 $\pm$ 0.04a                            | 0.74 $\pm$ 0.05b | 0.73 $\pm$ 0.04b | 0.71 $\pm$ 0.04b | 0.72 $\pm$ 0.05b | 0.70 $\pm$ 0.05b | 0.71 $\pm$ 0.05a        | 0.76 $\pm$ 0.05a |

Values followed by the same letters (a and b) within the column are not significantly different ( $p < 0.05$ ).

**Table S3.** Mean  $\pm$  (SEM) numbers of natural enemies in fields collected by sticky traps.

| Month  | Mean Number of Natural Enemies ( $\pm$ SEM) |                  |                  |                  |                  |                  |                         |                   |
|--------|---------------------------------------------|------------------|------------------|------------------|------------------|------------------|-------------------------|-------------------|
|        | Lady Beetle                                 | Syrphid Fly      | Lacewing         | Parasitic Wasp   | Predatory Fly    | Parasitic Fly    | Other Predatory Beetles | Predatory bug     |
| May    | 1.22 $\pm$ 0.24a                            | 0.69 $\pm$ 0.13a | 1.00 $\pm$ 0.17a | 0.66 $\pm$ 0.12a | 0.84 $\pm$ 0.18a | 0.69 $\pm$ 0.12a | 0.44 $\pm$ 0.13a        | 0.91 $\pm$ 0.16ab |
| June   | 1.16 $\pm$ 0.25a                            | 1.22 $\pm$ 0.21b | 0.97 $\pm$ 0.20a | 1.53 $\pm$ 0.22b | 0.91 $\pm$ 0.24a | 1.09 $\pm$ 0.19a | 0.50 $\pm$ 0.13a        | 0.84 $\pm$ 0.18a  |
| July   | 1.38 $\pm$ 0.25a                            | 1.38 $\pm$ 0.20b | 1.34 $\pm$ 0.24a | 1.38 $\pm$ 0.19b | 1.00 $\pm$ 0.21a | 1.09 $\pm$ 0.26a | 0.59 $\pm$ 0.11a        | 1.50 $\pm$ 0.23b  |
| August | 1.16 $\pm$ 0.25a                            | 1.28 $\pm$ 0.22b | 1.09 $\pm$ 0.23a | 1.31 $\pm$ 0.19b | 1.06 $\pm$ 0.21a | 0.84 $\pm$ 0.18a | 0.59 $\pm$ 0.11a        | 1.22 $\pm$ 0.20ab |

Values followed by the same letters (a and b) within the column are not significantly different ( $p < 0.05$ )

May corresponds to the late seedling and vegetative stage; June corresponds to the flowering stage; July corresponds to the fruiting stage and early maturity stages and August corresponds to the late maturity stage of the crop near harvest
